# Supplementary material
Source: PubMed Central journal article supplement (PMC9028814)
Supplement: NIHMS1791195-supplement-Supplementary_Figure_1.pdf [file NIHMS1791195-supplement-Supplementary_Figure_1.pdf]

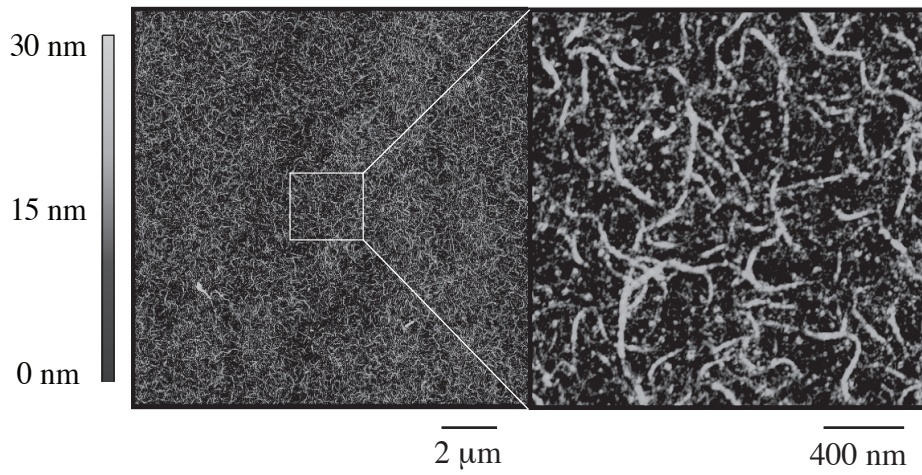

Supplementary Figure 1. Tapping mode AFM images of collagen thin films deposited at 100  $\mu\text{g}/\text{mL}$  on untreated glass substrates.
