# Supplementary material
Source: PubMed Central journal article supplement (PMC9028814)
Supplement: NIHMS1791195-supplement-Supplementary_Figure_2.pdf [file NIHMS1791195-supplement-Supplementary_Figure_2.pdf]

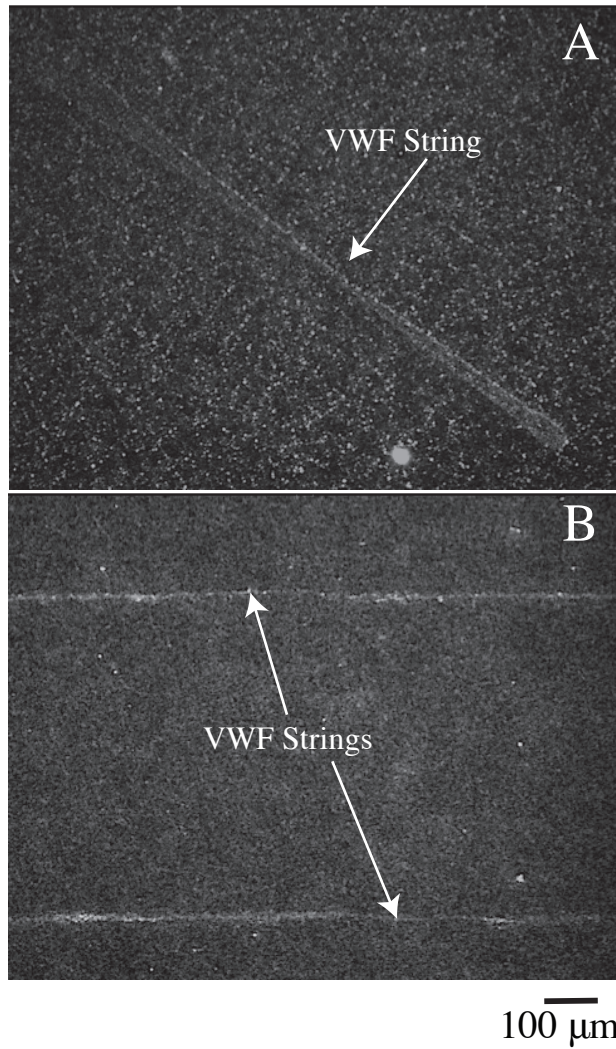

Supplementary Figure 2. Epifluorescence images of CTF1000 substrates after perfusion of plasma concentration levels of VWF (10  $\mu\text{g}/\text{mL}$ ) at 45  $\text{dynes}/\text{cm}^2$  for 2.5 min. Surfaces were immunofluorescently stained for VWF after perfusion.
