# Supplementary material
Source: PubMed Central journal article supplement (PMC9028814)
Supplement: NIHMS1791195-supplement-Supplementary_Table_1.pdf [file NIHMS1791195-supplement-Supplementary_Table_1.pdf]

**Supplementary Table 1.** Blood was collected by venipuncture first into a discard vacutainer, followed by PPACK vacutainer and PPACK-containing syringe. The final concentration of PPACK in each sample was 75 mM. Whole blood was diluted 1:10 and antibodies 1:2 in modified Tyrode buffer. In a polypropylene tube, 20  $\mu$ L of each selected antibody was added to 10  $\mu$ L of diluted blood. Following a 20 minute incubation at room temperature, 500  $\mu$ L of 1X BD FACS Lysing Solution was added to each sample and cells were analyzed using a Beckman Coulter FC500 flow cytometer. A PE-Cy5 mouse-anti-human CD41 antibody (BD Biosciences) was used to identify platelets, and mouse FITC PAC-1 (BD Biosciences) and FITC mouse-anti-human P-selectin (R&D Systems) were used as markers for platelet activation.

| Donor              | Vacutainer |            | Syringe    |            |
|--------------------|------------|------------|------------|------------|
|                    | % PAC-1    | % P-Sel    | % PAC-1    | %P-Sel     |
| 1                  | 0.3        | 5.2        | 0.3        | 4.3        |
| 2                  | 0.1        | 6.0        | 0.2        | 7.1        |
| 3                  | 0.1        | 3.2        | 0.2        | 3.5        |
| <b>Average</b>     | <b>0.2</b> | <b>4.8</b> | <b>0.2</b> | <b>5.0</b> |
| Standard Deviation | 0.1        | 1.4        | 0.2        | 1.9        |
| SEM                | 0.1        | 0.8        | <0.1       | 1.1        |
